# Supplementary material for: Determining the Effect of Natural Selection on Linked Neutral Divergence across Species
Source: PubMed Central journal article supplement (PMC4980041; doi:10.1371/journal.pgen.1006199), 2016-08-10

**A**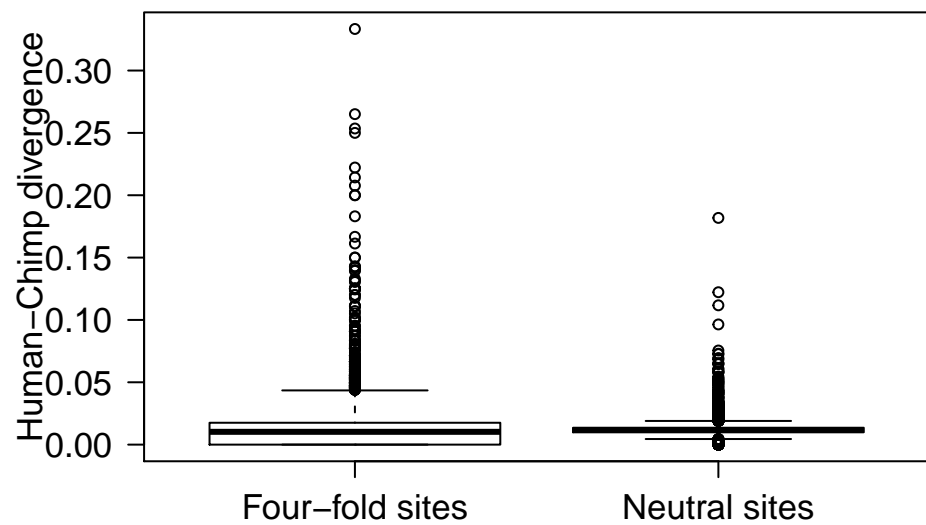**B**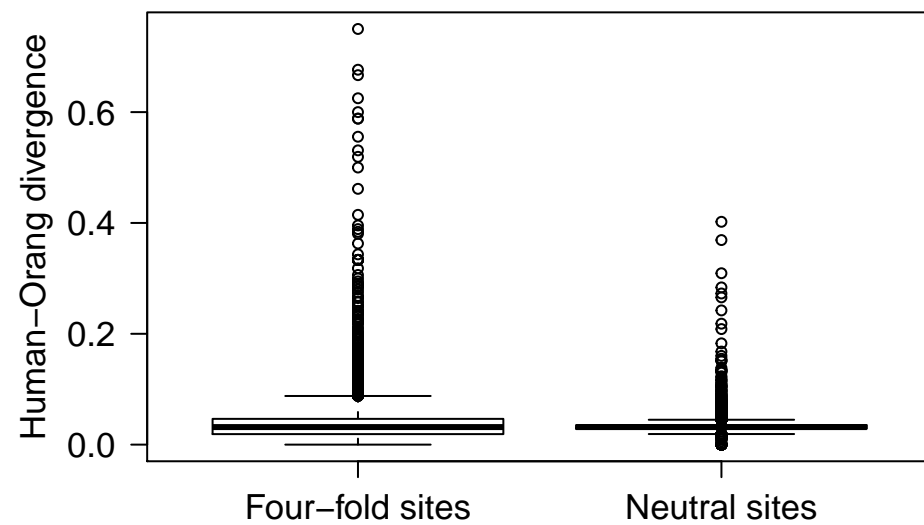**C**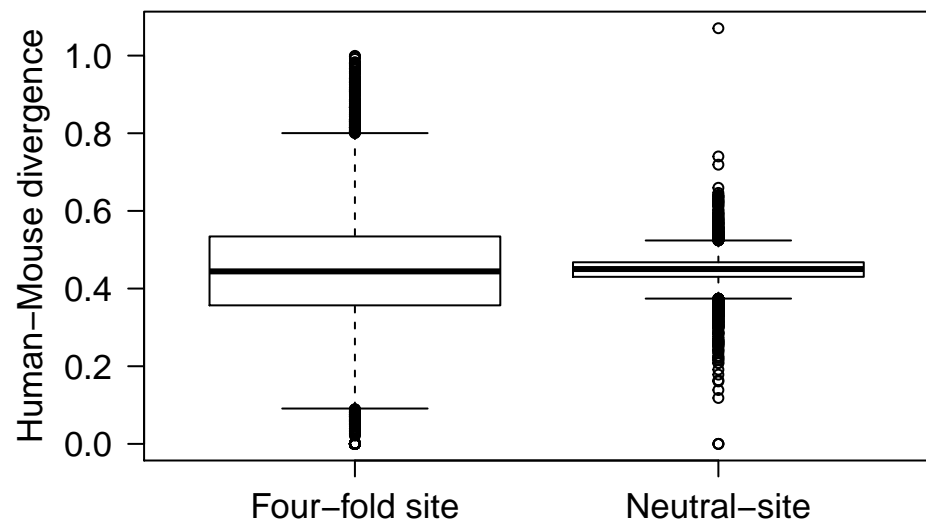**D**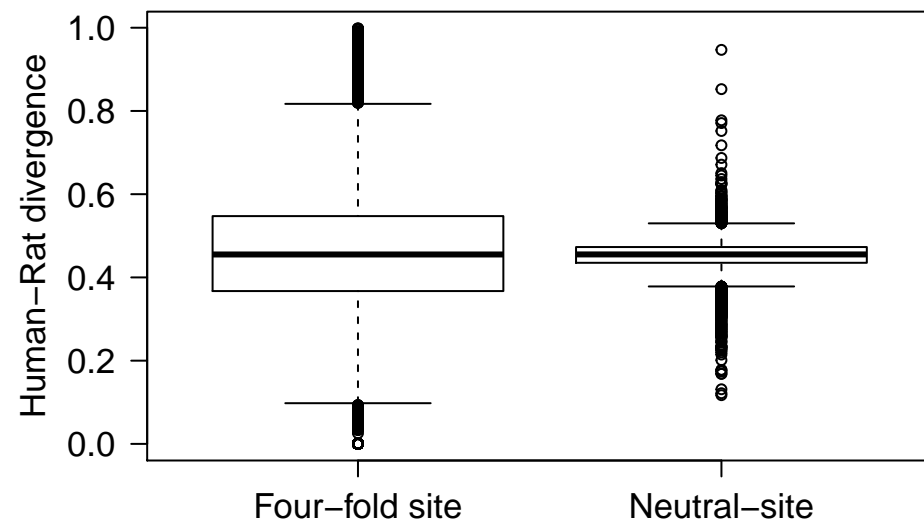

Supplement: pgen.1006199.s001.pdf [file pgen.1006199.s001.pdf]
