# Supplementary material for: Determining the Effect of Natural Selection on Linked Neutral Divergence across Species
Source: PubMed Central journal article supplement (PMC4980041; doi:10.1371/journal.pgen.1006199), 2016-08-10

### A. Human–Chimp without BGS

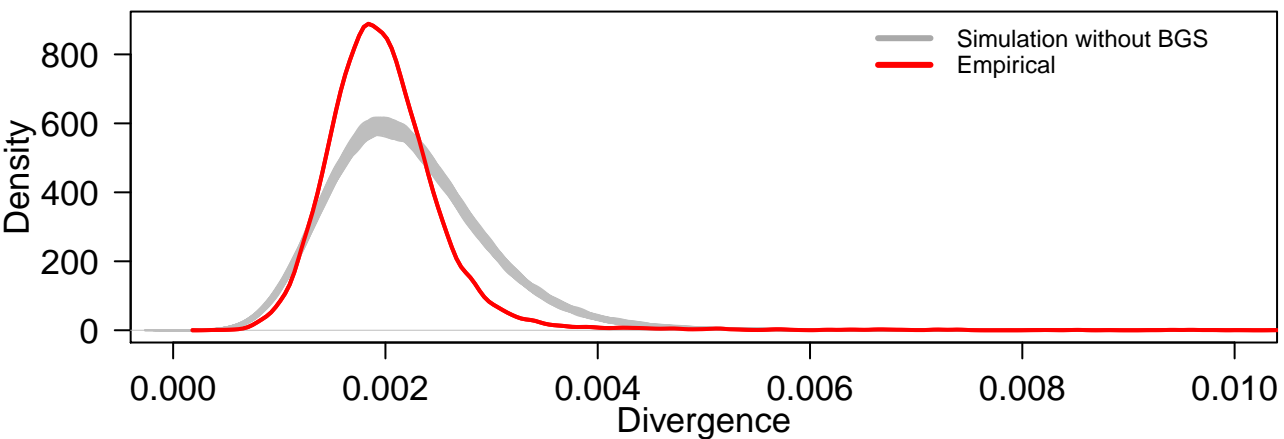

### B. Human–Chimp with BGS

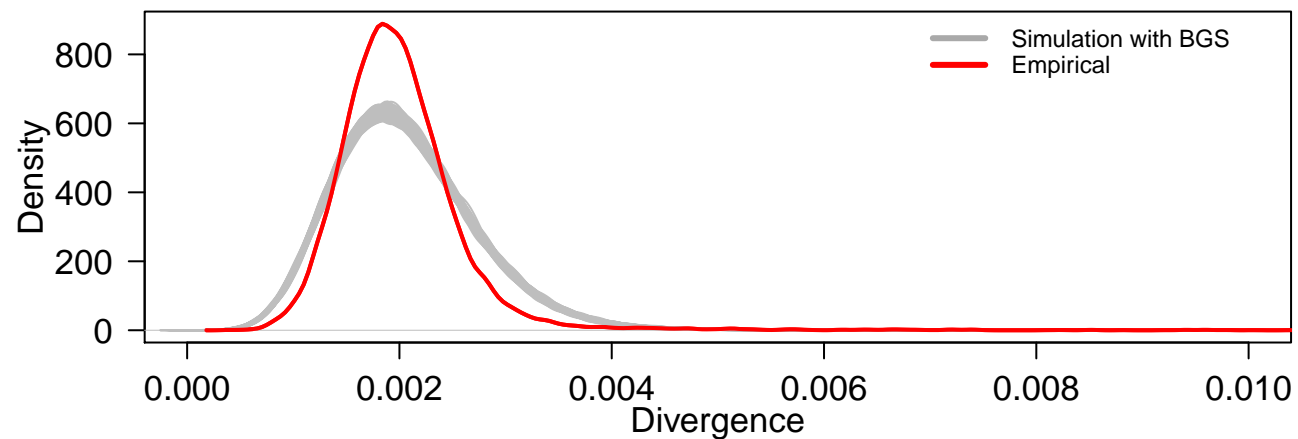

### C. Human–Mouse without BGS

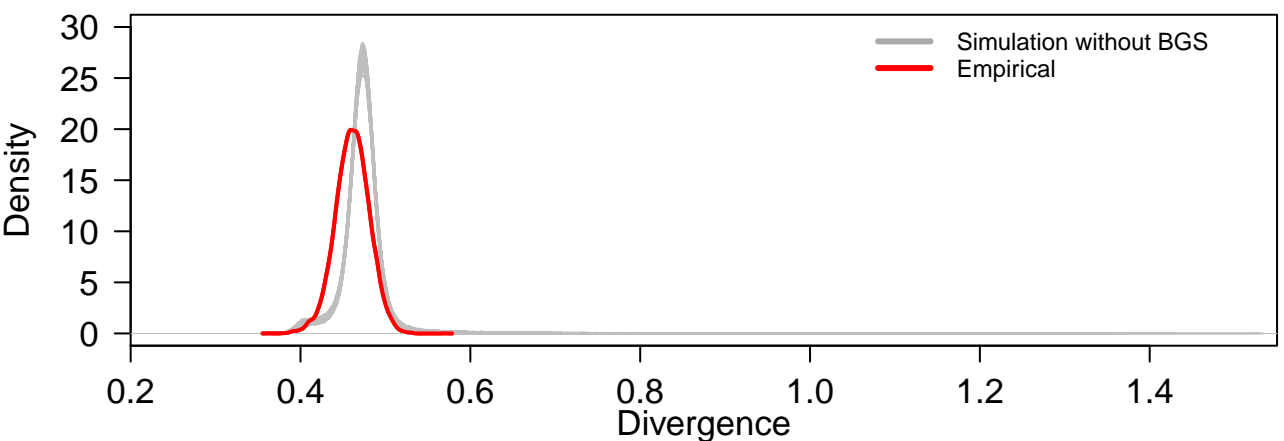

### D. Human–Mouse with BGS

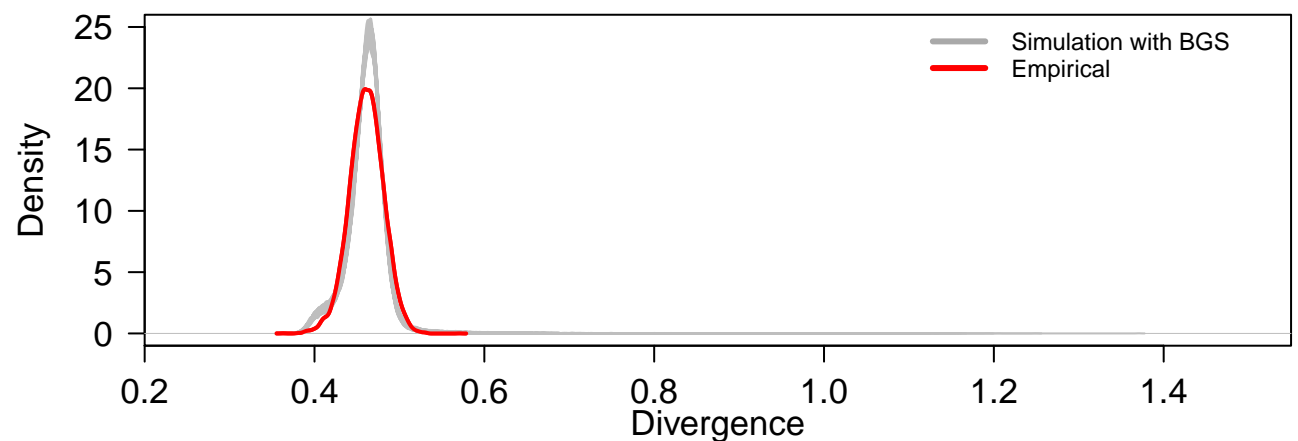

Supplement: pgen.1006199.s003.pdf [file pgen.1006199.s003.pdf]
