# Supplementary material for: Determining the Effect of Natural Selection on Linked Neutral Divergence across Species
Source: PubMed Central journal article supplement (PMC4980041; doi:10.1371/journal.pgen.1006199), 2016-08-10

**A. Human–Chimp without BGS**

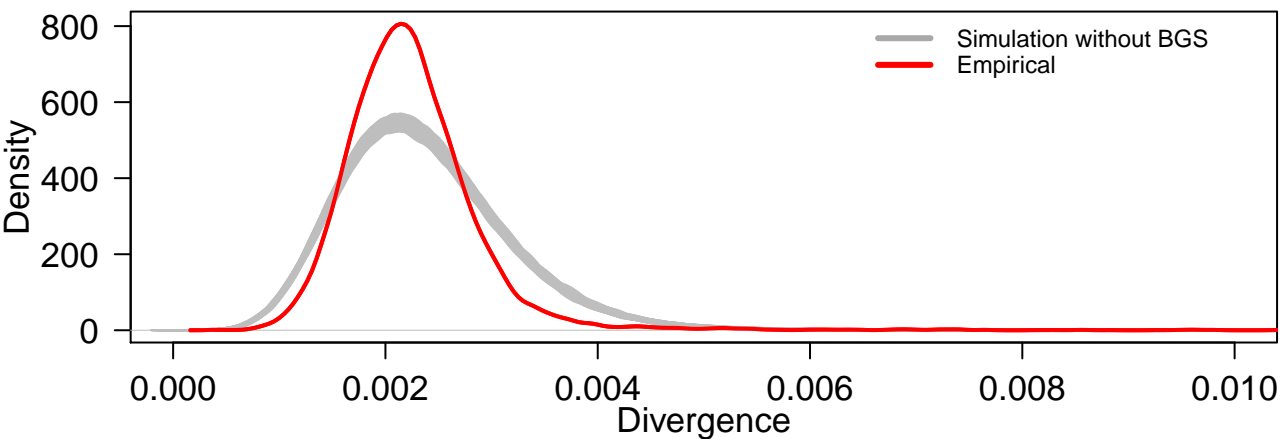

**B. Human–Chimp with BGS**

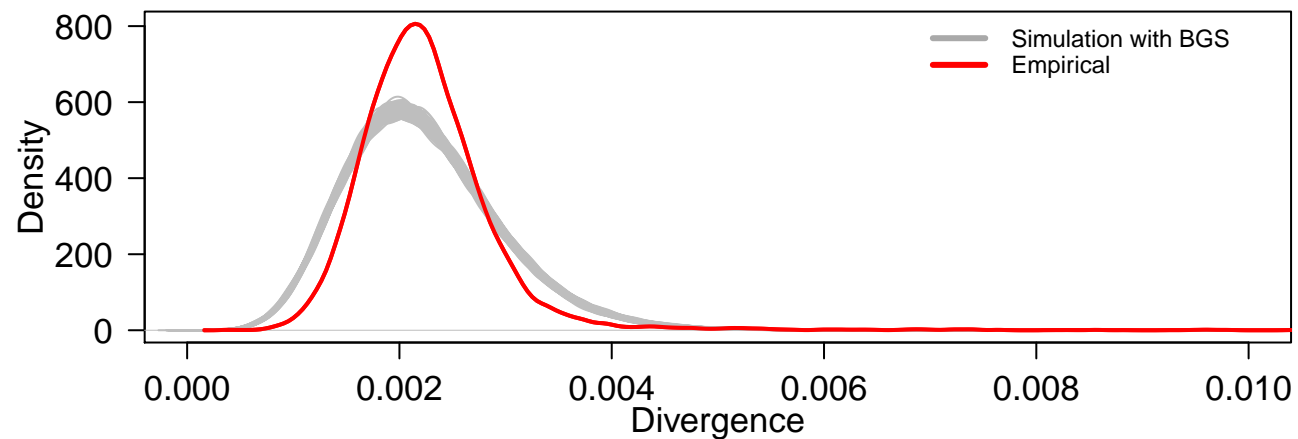

**C. Human–Mouse without BGS**

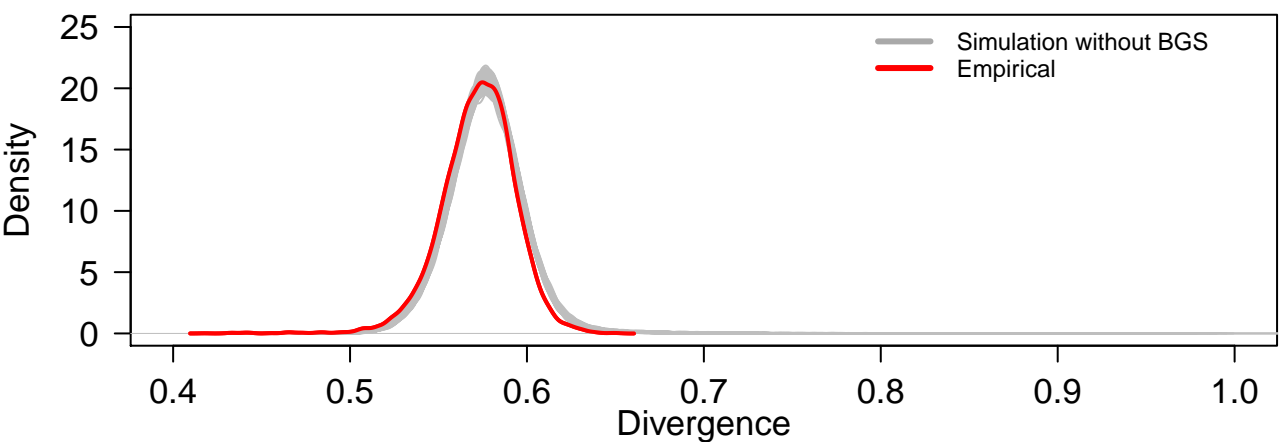

**D. Human–Mouse with BGS**

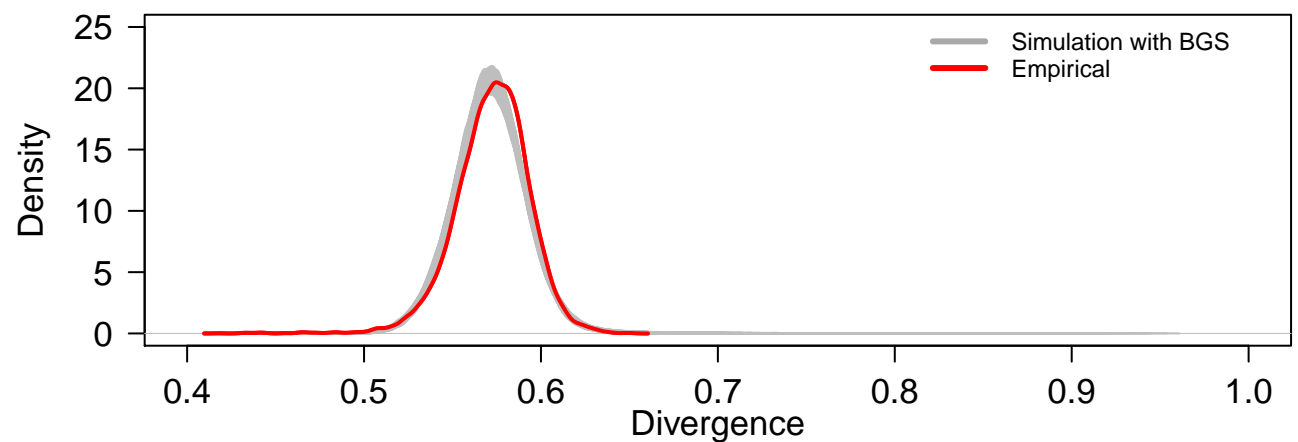

Supplement: pgen.1006199.s008.pdf [file pgen.1006199.s008.pdf]
