# Supplementary material for: Determining the Effect of Natural Selection on Linked Neutral Divergence across Species
Source: PubMed Central journal article supplement (PMC4980041; doi:10.1371/journal.pgen.1006199), 2016-08-10

$$\mu_a = 2 \times 10^{-8} / \text{gen.}$$

$$t_{\text{split}} = 75 \text{ MY}$$

$$t_{\text{human}} = 3 \times 10^6 \text{ gen.}$$

$$t_{\text{mouse}} = 75 \times 10^6 \text{ gen.}$$

**Human**

$$\mu_{\text{human}} = 3.75 \times 10^{-8} / \text{gen.}$$

$$\mu_{\text{mouse}} = 3.8 \times 10^{-9} / \text{gen.}$$

25 years/gen.

**Mouse**

1 year/gen.

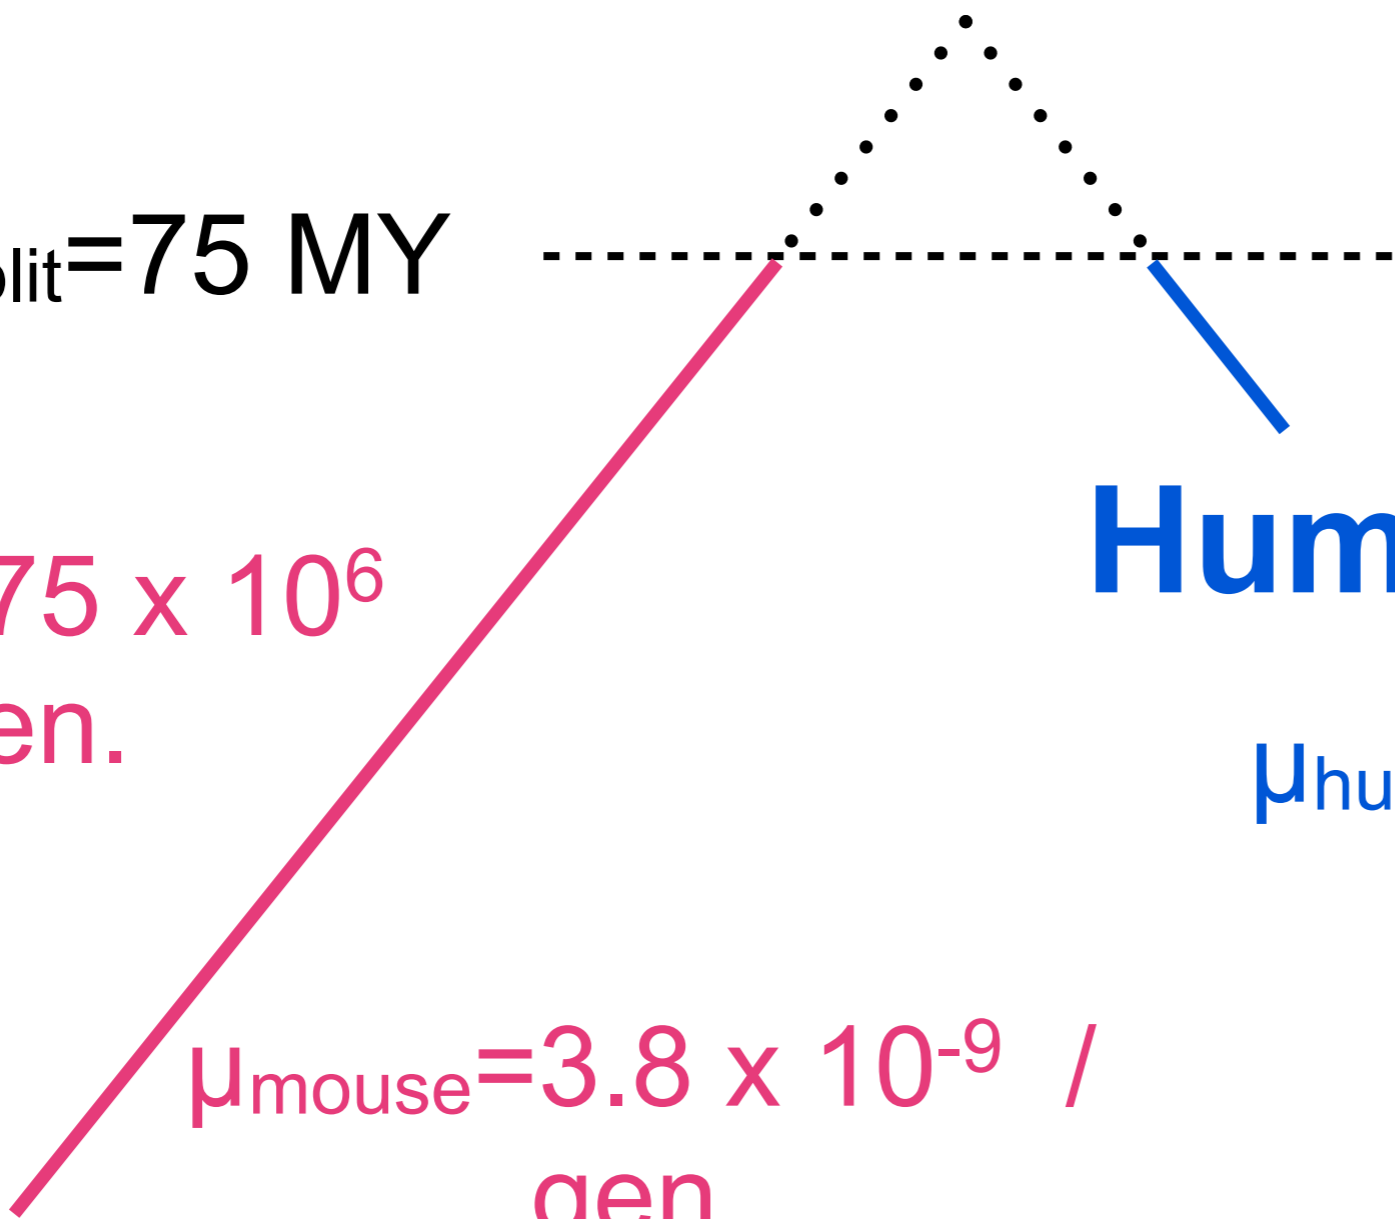

Supplement: pgen.1006199.s010.pdf [file pgen.1006199.s010.pdf]
