# Supplementary material for: Determining the Effect of Natural Selection on Linked Neutral Divergence across Species
Source: PubMed Central journal article supplement (PMC4980041; doi:10.1371/journal.pgen.1006199), 2016-08-10
Supplement: pgen.1006199.s011.pdf [file pgen.1006199.s011.pdf]

**S1 Table:** Summary statistics of divergence at four-fold sites and at putatively neutral regions

| Species pair |                          | Mean of divergence | Standard deviation of divergence |
|--------------|--------------------------|--------------------|----------------------------------|
| Human-chimp  | Four-fold sites          | 0.013              | 0.016                            |
|              | Putatively neutral sites | 0.012              | 0.005                            |
| Human-orang  | Four-fold sites          | 0.037              | 0.037                            |
|              | Putatively neutral sites | 0.033              | 0.012                            |
| Human-mouse  | Four-fold sites          | 0.444              | 0.152                            |
|              | Putatively neutral sites | 0.447              | 0.038                            |
| Human-rat    | Four-fold sites          | 0.456              | 0.156                            |
|              | Putatively neutral sites | 0.452              | 0.039                            |

The mean and standard deviation of divergence were computed over 100kb windows at four-fold degenerate sites and at putatively neutral sites. Windows where the total number of eligible sites was equal to 0 were excluded from both sets. Further, for human-mouse and human-rat, we corrected for multiple mutations with Kimura 2-parameter models. Note that for human-mouse and human-rat, we also excluded windows with unrealistically high divergence after the Kimura 2-parameter correction (i.e. windows where the divergence was greater than 1 were removed).
