# Supplementary material for: Determining the Effect of Natural Selection on Linked Neutral Divergence across Species
Source: PubMed Central journal article supplement (PMC4980041; doi:10.1371/journal.pgen.1006199), 2016-08-10
Supplement: pgen.1006199.s012.pdf [file pgen.1006199.s012.pdf]

**S2 Table:** Correlation coefficients of human-primate divergence and functional content

| Species pair | Spearman's $\rho$ overall | Spearman's $\rho$ post CpG filtering | Partial correlation controlling for GC content | Spearman's $\rho$ post gBGC filtering <sup>a</sup> | Partial correlation controlling for recombination | Spearman's $\rho$ when using 50kb-windows |
|--------------|---------------------------|--------------------------------------|------------------------------------------------|----------------------------------------------------|---------------------------------------------------|-------------------------------------------|
| Human-chimp  | -0.235**                  | -0.252**                             | -0.291**                                       | -0.243**                                           | -0.269**                                          | -0.186**                                  |
| Human-orang  | -0.204**                  | -0.232**                             | -0.289**                                       | -0.255**                                           | -0.241**                                          | -0.184**                                  |

\*\*p-value < 2.2e-16

<sup>a</sup>Spearman's  $\rho$  after filtering sites possibly affected by GC-biased gene conversion (see text).
