# Supplementary material for: Determining the Effect of Natural Selection on Linked Neutral Divergence across Species
Source: PubMed Central journal article supplement (PMC4980041; doi:10.1371/journal.pgen.1006199), 2016-08-10
Supplement: pgen.1006199.s013.pdf [file pgen.1006199.s013.pdf]

**S3 Table:** Correlation coefficients of human-primate divergence and recombination rate.

| Species pair | Spearman's $\rho$ overall | Spearman's $\rho$ post CpG filtering | Partial correlation controlling for GC content | Spearman's $\rho$ post gBGC filtering <sup>a</sup> | Spearman's $\rho$ when using 50 kb windows |
|--------------|---------------------------|--------------------------------------|------------------------------------------------|----------------------------------------------------|--------------------------------------------|
| Human-chimp  | 0.234**                   | 0.207**                              | 0.242**                                        | 0.108**                                            | 0.182**                                    |
| Human-orang  | 0.249**                   | 0.221**                              | 0.240**                                        | 0.088**                                            | 0.209**                                    |

\*\*p-value < 2.2e-16

<sup>a</sup>Spearman's  $\rho$  after filtering sites possibly affected by GC-biased gene conversion (see text).
