# Supplementary material for: Determining the Effect of Natural Selection on Linked Neutral Divergence across Species
Source: PubMed Central journal article supplement (PMC4980041; doi:10.1371/journal.pgen.1006199), 2016-08-10
Supplement: pgen.1006199.s014.pdf [file pgen.1006199.s014.pdf]

**S4 Table:** Correlation coefficients of human-rodent divergence and functional content.

| Species pair | Spearman's $\rho$ overall | Spearman's $\rho$ post CpG filtering | Partial correlation controlling for GC content | Partial correlation controlling for recombination | Spearman's $\rho$ post gBGC filtering <sup>a</sup> | Spearman's $\rho$ when using 50 kb windows |
|--------------|---------------------------|--------------------------------------|------------------------------------------------|---------------------------------------------------|----------------------------------------------------|--------------------------------------------|
| Human-mouse  | -0.184**                  | -0.202**                             | -0.243**                                       | -0.194**                                          | -0.339**                                           | -0.135**                                   |
| Human-rat    | -0.149**                  | -0.169**                             | -0.206**                                       | -0.156**                                          | -0.337**                                           | -0.103**                                   |

\*\*p-value < 2.2e-16

<sup>a</sup>Spearman's  $\rho$  after filtering sites possibly affected by GC-biased gene conversion (see text).
