# Supplementary material for: Determining the Effect of Natural Selection on Linked Neutral Divergence across Species
Source: PubMed Central journal article supplement (PMC4980041; doi:10.1371/journal.pgen.1006199), 2016-08-10
Supplement: pgen.1006199.s015.pdf [file pgen.1006199.s015.pdf]

**S5 Table:** Correlation coefficients of human-rodent divergence and McVicker's *B*-values

| Species pair | Spearman's $\rho$ overall | Spearman's $\rho$ post CpG filtering | Partial correlation controlling for GC content | Spearman's $\rho$ post gBGC filtering <sup>a</sup> | Spearman's $\rho$ when using 50 kb windows |
|--------------|---------------------------|--------------------------------------|------------------------------------------------|----------------------------------------------------|--------------------------------------------|
| Human-mouse  | 0.445**                   | 0.450**                              | 0.456**                                        | 0.419**                                            | 0.403**                                    |
| Human-rat    | 0.402**                   | 0.405**                              | 0.413**                                        | 0.404**                                            | 0.366**                                    |

\*\*p-value < 2.2e-16

<sup>a</sup>Spearman's  $\rho$  after filtering sites possibly affected by GC-biased gene conversion (see text).
