# Supplementary material for: Determining the Effect of Natural Selection on Linked Neutral Divergence across Species
Source: PubMed Central journal article supplement (PMC4980041; doi:10.1371/journal.pgen.1006199), 2016-08-10
Supplement: pgen.1006199.s016.pdf [file pgen.1006199.s016.pdf]

**S6 Table:** Summary of parameters used for the coalescent simulations.

| Species pair           | Shape             | Scale                 | $\mu$ (average) <sup>a</sup> | $N_a$  | t-split (generations) |
|------------------------|-------------------|-----------------------|------------------------------|--------|-----------------------|
| Human-chimp<br>GERP 10 | 16.82             | $1.7 \times 10^{-10}$ | $2.9 \times 10^{-9}$         | 70000  | 240000                |
| Human-chimp<br>GERP 25 | 15.68             | $1.8 \times 10^{-10}$ | $2.8 \times 10^{-9}$         | 71000  | 280000                |
| Human-mouse<br>GERP 10 | $4.0 \times 10^3$ | $5.0 \times 10^{-12}$ | $2.0 \times 10^{-8}$         | 940000 | N/A                   |
| Human-mouse<br>GERP 25 | $1.6 \times 10^3$ | $1.7 \times 10^{-11}$ | $2.7 \times 10^{-8}$         | 375000 | N/A                   |

Note that shape and scale refer to the shape and scale parameters used for the gamma distribution of mutation rates.

<sup>a</sup>We filtered all AT→GC changes between the human and chimp sequences as they could be affected by biased gene conversion. Thus, the mutation rates used here are substantially lower than commonly used values.
