# Supplementary material for: Determining the Effect of Natural Selection on Linked Neutral Divergence across Species
Source: PubMed Central journal article supplement (PMC4980041; doi:10.1371/journal.pgen.1006199), 2016-08-10
Supplement: pgen.1006199.s017.pdf [file pgen.1006199.s017.pdf]

**S7 Table:** Comparison of the mean and standard deviation of the empirical and simulated divergence

| Species pair        | Empirical mean | Average of the mean of simulated divergence from 500 simulations |                    | Empirical standard deviation | Average of the standard deviation of simulated divergence from 500 simulations |                      |
|---------------------|----------------|------------------------------------------------------------------|--------------------|------------------------------|--------------------------------------------------------------------------------|----------------------|
|                     |                | Without BGS                                                      | With BGS           |                              | Without BGS                                                                    | With BGS             |
| Human-chimp GERP 10 | 0.002          | 0.002 <sup>a</sup>                                               | 0.002 <sup>a</sup> | 6.8X10 <sup>-4</sup>         | 7.4X10 <sup>-4</sup>                                                           | 6.7X10 <sup>-4</sup> |
| Human-chimp GERP 25 | 0.002          | 0.002 <sup>a</sup>                                               | 0.002 <sup>a</sup> | 7.2X10 <sup>-4</sup>         | 7.9X10 <sup>-4</sup>                                                           | 7.3X10 <sup>-4</sup> |
| Human-mouse GERP 10 | 0.461          | 0.473                                                            | 0.461              | 0.020                        | 0.027                                                                          | 0.024                |
| Human-mouse GERP 25 | 0.572          | 0.577                                                            | 0.571              | 0.021                        | 0.022                                                                          | 0.021                |

Note that empirical mean and empirical standard deviation refer to the average neutral divergence calculated over 100kb windows.

<sup>a</sup>We filtered all AT→GC changes between the human and chimp sequences as they could be affected by biased gene conversion. Thus, the mean human-chimp divergence reported here is lower than the overall divergence.
