# Supplementary material for: Determining the Effect of Natural Selection on Linked Neutral Divergence across Species
Source: PubMed Central journal article supplement (PMC4980041; doi:10.1371/journal.pgen.1006199), 2016-08-10
Supplement: pgen.1006199.s018.pdf [file pgen.1006199.s018.pdf]

**S8 Table:** GERP RS score cutoff

| Proportion of the genome to be removed | Remove sites whose RS score is |
|----------------------------------------|--------------------------------|
| 5%                                     | > 4.949                        |
| 10%                                    | > 4.078                        |
| 15%                                    | > 3.207                        |
| 20%                                    | > 2.336                        |
| 25%                                    | > 1.465                        |

Note that we also removed sites whose RS score is equal to 0.
